# Supplementary material for: Genetic legacy and adaptive signatures: investigating the history, diversity, and selection signatures in Rendena cattle resilient to eighteenth century rinderpest epidemics
Source: Springer Nature journal article supplement (doi:10.1186/s12711-024-00900-y), 2024-05-02

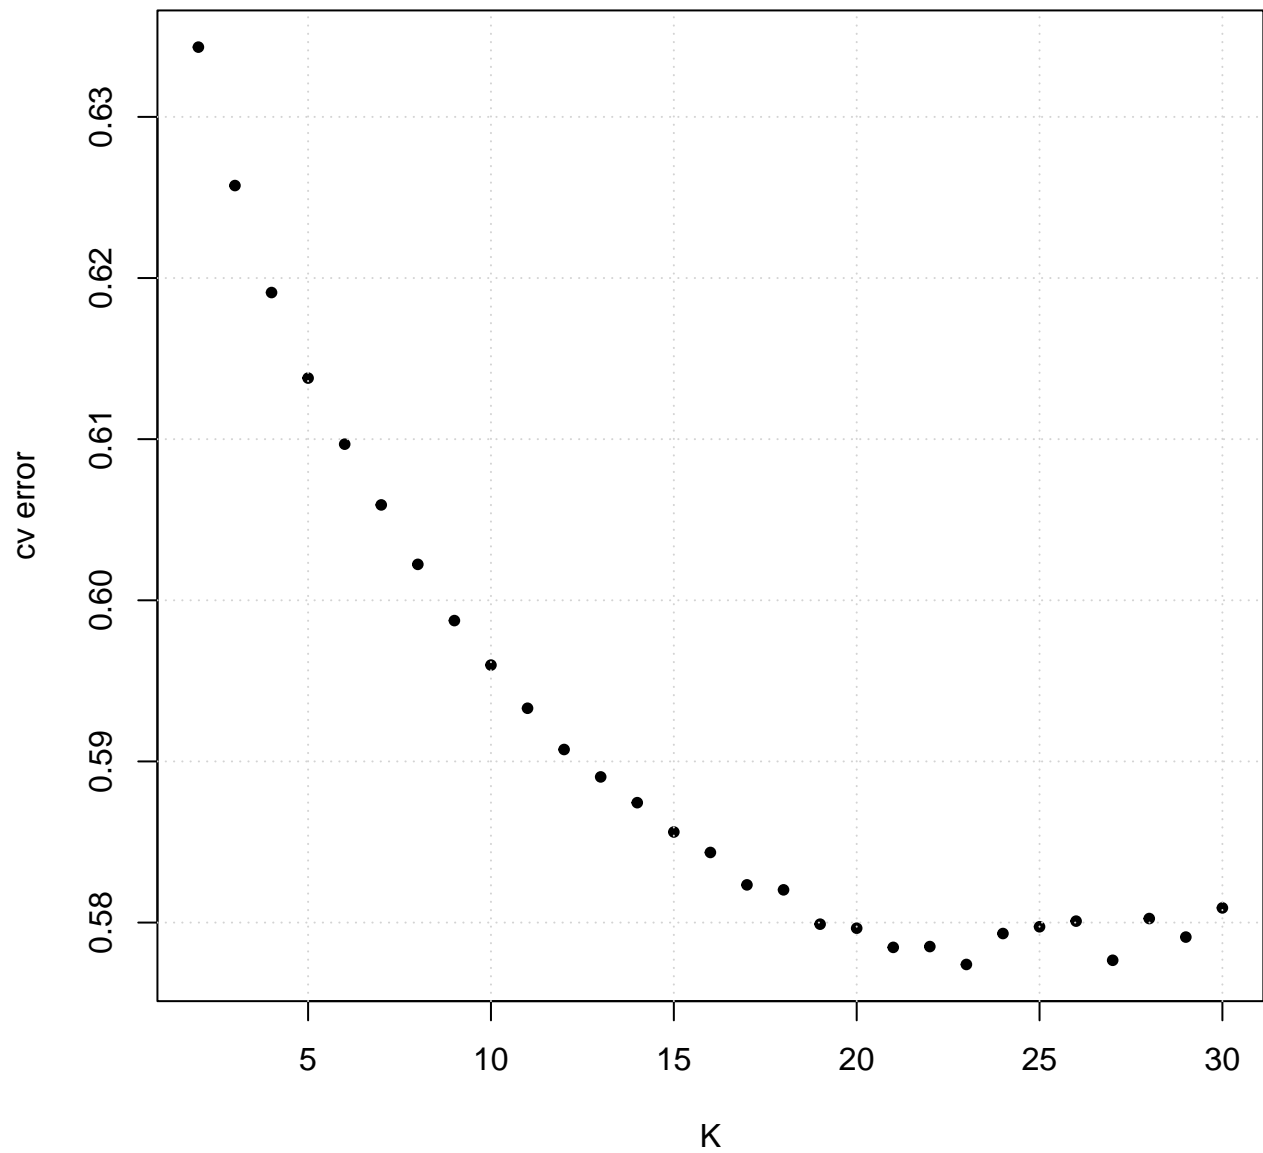

Supplement: MOESM6 [file 12711_2024_900_MOESM6_ESM.pdf]
